# Supplementary material
Source: PubMed Central journal article supplement (PMC2997764)
Supplement: NIHMS248444-supplement-Supp1.pdf [file NIHMS248444-supplement-Supp1.pdf]

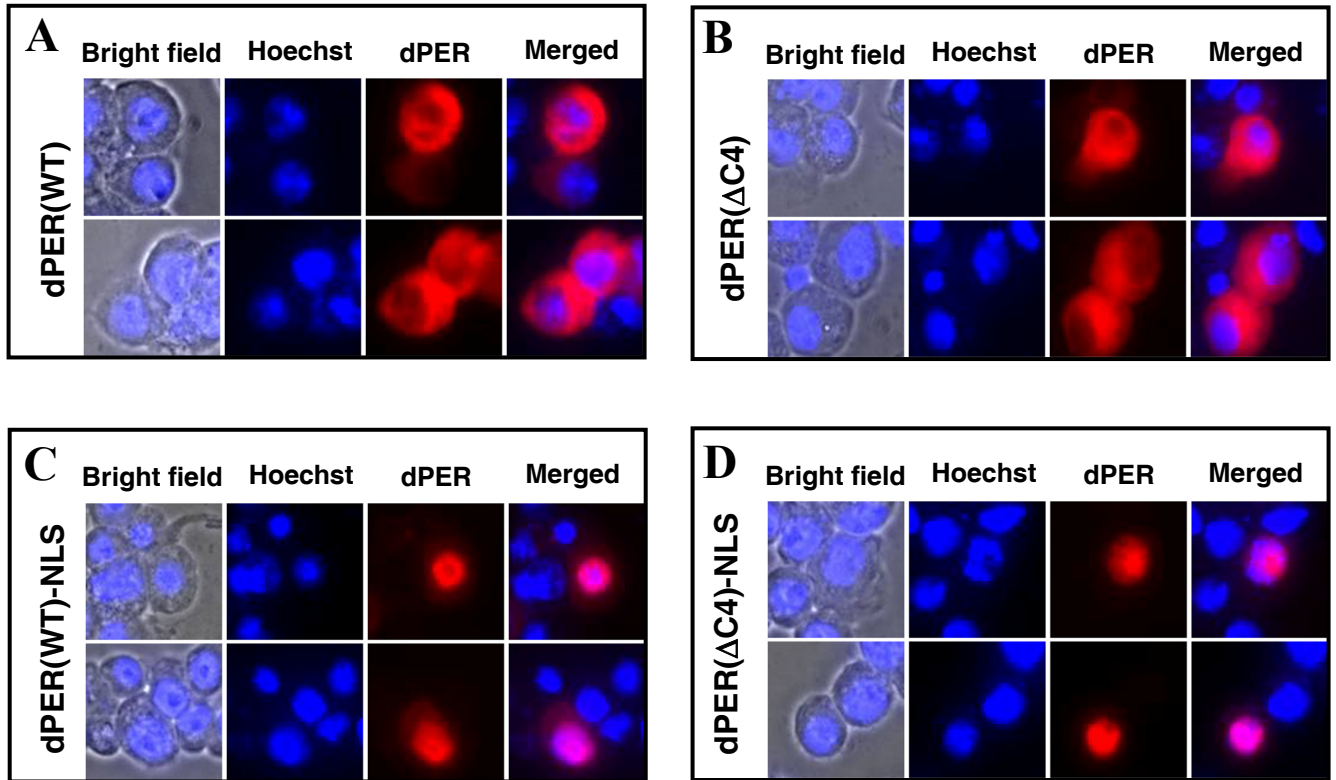

**Figure S1.** Similar cellular localizations of dPER(WT) and dPER( $\Delta$ C4) in S2 cells. S2 cells were transiently transfected with pAct-*dper*-V5 (A), pAct-*dper* $\Delta$ C4-V5 (B), pAct-*dper*-NLS-V5 (C) or pAct-*dper* $\Delta$ C4-NLS-V5 (D) and at 36 hr post-transfection, processed for immunohistochemistry. dPER proteins were visualized with anti-V5 antibody labeled with Alexafluor-555. Nuclei were stained with Hoechst 33258. Images were taken using an AxioVision fluorescence microscope (Zeiss) and processed with AxioVision LE software (Zeiss). (C,D) Note that by putting NLS at the C-terminus of dPER(WT) or dPER( $\Delta$ C4), nuclear localization of dPER (WT) or dPER( $\Delta$ C4) is augmented.
